# Supplementary material for: Estimates of benefits and harms of prophylactic use of aspirin in the general population
Source: PubMed Central journal article supplement — Ann Oncol. 2014 Aug 5;26(1):47–57. doi: 10.1093/annonc/mdu225 (PMC4269341; doi:10.1093/annonc/mdu225), 2014-08-05
Supplement: supp_mdu225_mdu225supp_data.pdf [file supp_mdu225_mdu225supp_data.pdf]

## **Estimates of benefits and harms of prophylactic use of aspirin in the general population.**

J. Cuzick, M. A. Thorat, C. Bosetti, P. H. Brown, J. Burn, N. R. Cook, L. G. Ford, E. J. Jacobs, J. A. Jankowski, C. La Vecchia, M. Law, F. Meyskens, P. M. Rothwell, H. J. Senn, A. Umar

doi:10.1093/annonc/mdu225

### **Supplementary material:**

#### **Section A:**

Supplementary tables

#### **Section B:**

Supplementary text

**Section A:**

**Sensitivity analyses:** The results of benefit-harm analyses under different assumptions are presented.

**Overall benefits and harms of aspirin prophylaxis in the general population assessed with 5 years of aspirin use**

Tables 4 and 5 in the main paper display benefits and harms associated with 10 years of aspirin use. Here we show the benefits and harms associated with **5 years** of aspirin use. The incidence of major events (cancer, myocardial infarction, stroke, major bleeding) and mortality are summarized in Supplementary Tables W1 and W2, respectively. We also show benefits and harms associated with 10 years of aspirin use if the effect of aspirin is restricted to only three gastrointestinal cancers (colorectal, oesophageal and gastric cancers) in Supplementary Tables W3 and W4.

**Supplementary Table W1: Benefits and harms of 5 years of aspirin use on the incidence of major events by age and sex.**

Baseline probabilities of an event and aspirin-related reductions (per 100 individuals in 10 years) using best (and conservative) estimates for prophylactic use of aspirin for 5 years on the incidence of major events viz. cancer, myocardial infarction, stroke, and major bleeding according to sex and age at starting use. All estimates are adjusted for intercurrent mortality.

Effects on cardiovascular and bleeding events are assumed to occur only during active treatment (5 years) and those for cancer do not start until after 3 years of use but persist for an additional 5 years after treatment completion. Baseline rates are for the entire 10 year period. Figures in parentheses are conservative estimates.

| Age at starting<br>Incidence      |       | 50 years |                | 55 years |                | 60 years |                | 65 years |                |
|-----------------------------------|-------|----------|----------------|----------|----------------|----------|----------------|----------|----------------|
|                                   |       | Baseline | Reduction      | Baseline | Reduction      | Baseline | Reduction      | Baseline | Reduction      |
| Cancer                            | Men   | 4.86     | 0.37<br>(0.26) | 8.28     | 0.69<br>(0.48) | 12.77    | 1.11<br>(0.77) | 17.11    | 1.42<br>(0.99) |
|                                   | Women | 6.08     | 0.37<br>(0.23) | 8.02     | 0.51<br>(0.33) | 10.25    | 0.70<br>(0.46) | 11.95    | 0.81<br>(0.56) |
| MI                                | Men   | 2.99     | 0.23           | 3.96     | 0.31           | 5.27     | 0.40           | 6.91     | 0.54           |
|                                   | Women | 0.83     | 0.06           | 1.30     | 0.09           | 2.14     | 0.15           | 3.55     | 0.24           |
| Stroke                            | Men   | 1.16     | 0.02           | 1.71     | 0.04           | 2.56     | 0.05           | 3.86     | 0.08           |
|                                   | Women | 0.93     | 0.02           | 1.36     | 0.03           | 2.03     | 0.04           | 3.15     | 0.06           |
| TOTAL                             | Men   | 9.01     | 0.62<br>(0.51) | 13.95    | 1.03<br>(0.82) | 20.59    | 1.56<br>(1.23) | 27.87    | 2.04<br>(1.61) |
|                                   | Women | 7.84     | 0.45<br>(0.31) | 10.68    | 0.63<br>(0.45) | 14.43    | 0.88<br>(0.65) | 18.64    | 1.12<br>(0.86) |
| <b>Adverse events</b>             |       | Baseline | Excess         | Baseline | Excess         | Baseline | Excess         | Baseline | Excess         |
| Major<br>extracranial<br>bleeding | Men   | 0.60     | 0.12<br>(0.15) | 0.93     | 0.21<br>(0.27) | 1.24     | 0.30<br>(0.39) | 1.54     | 0.39<br>(0.50) |
|                                   | Women | 0.30     | 0.06<br>(0.08) | 0.47     | 0.10<br>(0.14) | 0.63     | 0.15<br>(0.19) | 0.80     | 0.20<br>(0.26) |
| Net Benefit                       | Men   | 9.61     | 0.50<br>(0.36) | 14.88    | 0.82<br>(0.55) | 21.83    | 1.26<br>(0.84) | 29.41    | 1.66<br>(1.11) |
|                                   | Women | 8.14     | 0.39<br>(0.23) | 11.15    | 0.53<br>(0.31) | 15.06    | 0.73<br>(0.45) | 19.44    | 0.92<br>(0.60) |

**Supplementary Table W2: Benefits and harms of 5 years of aspirin use on mortality by age and sex.**

Baseline 15-year event specific mortality probabilities and aspirin-related reductions (per 100 individuals) using best (and conservative) estimates for prophylactic use of aspirin for 5 years on mortality due to cancer, myocardial infarction, stroke, and aspirin-related adverse events (peptic ulcer and gastrointestinal bleeding) according to sex and age at starting use.

Effects on cardiovascular and bleeding events are assumed to occur only during active treatment (5 years) and those for cancer do not start until after 5 years of use but persist for an additional 10 years after treatment completion. Baseline rates are for the entire 15 year period. Figures in parentheses are conservative estimates.

| Age at starting<br>Mortality |       | 50 years |                | 55 years |                | 60 years |                | 65 years |                |
|------------------------------|-------|----------|----------------|----------|----------------|----------|----------------|----------|----------------|
|                              |       | Baseline | Reduction      | Baseline | Reduction      | Baseline | Reduction      | Baseline | Reduction      |
| <b>Cancer</b>                | Men   | 4.08     | 0.50<br>(0.40) | 6.93     | 0.82<br>(0.66) | 10.63    | 1.20<br>(0.96) | 14.97    | 1.61<br>(1.28) |
|                              | Women | 3.62     | 0.28<br>(0.20) | 5.48     | 0.43<br>(0.32) | 7.81     | 0.62<br>(0.46) | 10.60    | 0.86<br>(0.65) |
| <b>MI</b>                    | Men   | 2.78     | 0.02           | 4.69     | 0.04           | 7.45     | 0.08           | 10.85    | 0.13           |
|                              | Women | 0.84     | 0.01           | 1.70     | 0.01           | 3.28     | 0.03           | 5.72     | 0.05           |
| <b>TOTAL</b>                 | Men   | 6.87     | 0.52<br>(0.43) | 11.62    | 0.86<br>(0.70) | 18.09    | 1.28<br>(1.04) | 25.82    | 1.74<br>(1.41) |
|                              | Women | 4.45     | 0.29<br>(0.21) | 7.17     | 0.44<br>(0.33) | 11.10    | 0.65<br>(0.49) | 16.31    | 0.91<br>(0.70) |
| <b>Adverse events</b>        |       | Baseline | Excess         | Baseline | Excess         | Baseline | Excess         | Baseline | Excess         |
| <b>Stroke</b>                | Men   | 0.54     | 0.02           | 0.94     | 0.04           | 1.73     | 0.06           | 3.10     | 0.11           |
|                              | Women | 0.38     | 0.02           | 0.66     | 0.03           | 1.37     | 0.04           | 2.82     | 0.08           |
| <b>GI bleeding</b>           | Men   | 0.12     | 0.02<br>(0.02) | 0.16     | 0.02<br>(0.02) | 0.32     | 0.04<br>(0.04) | 0.54     | 0.05<br>(0.06) |
|                              | Women | 0.07     | 0.01<br>(0.01) | 0.11     | 0.01<br>(0.02) | 0.21     | 0.02<br>(0.02) | 0.37     | 0.03<br>(0.04) |
| <b>Peptic Ulcer</b>          | Men   | 0.06     | 0.01<br>(0.01) | 0.07     | 0.01<br>(0.01) | 0.11     | 0.01<br>(0.02) | 0.14     | 0.02<br>(0.02) |
|                              | Women | 0.05     | 0.01<br>(0.01) | 0.06     | 0.01<br>(0.01) | 0.09     | 0.01<br>(0.01) | 0.12     | 0.01<br>(0.02) |
| <b>TOTAL</b>                 | Men   | 0.71     | 0.05<br>(0.06) | 1.17     | 0.06<br>(0.07) | 2.16     | 0.11<br>(0.12) | 3.77     | 0.18<br>(0.19) |
|                              | Women | 0.50     | 0.04<br>(0.04) | 0.82     | 0.05<br>(0.05) | 1.67     | 0.07<br>(0.07) | 3.31     | 0.13<br>(0.14) |
| <b>All-cause Deaths</b>      | Men   | 10.34    | 0.47<br>(0.37) | 16.23    | 0.80<br>(0.63) | 25.20    | 1.17<br>(0.92) | 38.92    | 1.56<br>(1.22) |
|                              | Women | 6.82     | 0.25<br>(0.17) | 10.52    | 0.39<br>(0.27) | 16.77    | 0.58<br>(0.41) | 27.46    | 0.78<br>(0.56) |

**Supplementary Table W3: Benefits and harms of 10 years of aspirin use on the incidence of major events by age and sex (effects on only 3 GI cancers).**

Baseline probabilities of an event and aspirin-related reductions (per 100 individuals in 15 years) using best (and conservative) estimates for prophylactic use of aspirin for 10 years on the incidence of major events viz. cancer, myocardial infarction, stroke, and major bleeding according to sex and age at starting use. All estimates are adjusted for intercurrent mortality.

Effects on cardiovascular and bleeding events are assumed to occur only during active treatment (10 years) and those for cancer do not start until after 3 years of use but persist for an additional 5 years after treatment completion. The effect of aspirin is restricted to only three gastrointestinal cancers (colorectal, oesophageal and gastric cancers). Baseline rates are for the entire 15 year period. Figures in parentheses are conservative estimates.

| Age at starting                     |       | 50 years |                | 55 years |                | 60 years |                | 65 years |                |
|-------------------------------------|-------|----------|----------------|----------|----------------|----------|----------------|----------|----------------|
|                                     |       | Baseline | Reduction      | Baseline | Reduction      | Baseline | Reduction      | Baseline | Reduction      |
| <b>Cancer</b>                       | Men   | 9.70     | 0.63<br>(0.53) | 15.20    | 1.02<br>(0.87) | 20.75    | 1.39<br>(1.18) | 25.39    | 1.69<br>(1.44) |
|                                     | Women | 10.41    | 0.36<br>(0.31) | 13.19    | 0.56<br>(0.47) | 15.78    | 0.77<br>(0.65) | 18.08    | 0.99<br>(0.84) |
| <b>MI</b>                           | Men   | 5.13     | 0.52           | 6.75     | 0.68           | 8.72     | 0.89           | 10.92    | 1.15           |
|                                     | Women | 1.62     | 0.15           | 2.59     | 0.23           | 4.22     | 0.37           | 6.69     | 0.61           |
| <b>Stroke</b>                       | Men   | 2.14     | 0.06           | 3.16     | 0.08           | 4.66     | 0.12           | 6.66     | 0.18           |
|                                     | Women | 1.71     | 0.05           | 2.54     | 0.07           | 3.84     | 0.10           | 5.75     | 0.15           |
| <b>TOTAL</b>                        | Men   | 16.97    | 1.21<br>(1.11) | 25.11    | 1.79<br>(1.63) | 34.13    | 2.41<br>(2.20) | 42.97    | 3.03<br>(2.78) |
|                                     | Women | 13.74    | 0.56<br>(0.50) | 18.32    | 0.85<br>(0.77) | 23.83    | 1.24<br>(1.13) | 30.53    | 1.75<br>(1.60) |
| <b>Adverse events</b>               |       | Baseline | Excess         | Baseline | Excess         | Baseline | Excess         | Baseline | Excess         |
| <b>Major extra-cranial bleeding</b> | Men   | 1.12     | 0.32<br>(0.42) | 1.58     | 0.49<br>(0.64) | 2.00     | 0.66<br>(0.85) | 2.37     | 0.81<br>(1.05) |
|                                     | Women | 0.57     | 0.16<br>(0.21) | 0.81     | 0.25<br>(0.32) | 1.05     | 0.34<br>(0.44) | 1.30     | 0.43<br>(0.55) |
| <b>Net Benefit</b>                  | Men   | 18.09    | 0.88<br>(0.70) | 26.70    | 1.29<br>(0.99) | 36.13    | 1.75<br>(1.35) | 45.34    | 2.22<br>(1.72) |
|                                     | Women | 14.31    | 0.40<br>(0.29) | 19.13    | 0.60<br>(0.45) | 24.88    | 0.90<br>(0.69) | 31.83    | 1.32<br>(1.05) |

**Supplementary Table W4: Benefits and harms of 10 years of aspirin use on mortality by age and sex (effects on only 3 GI cancers).**

Baseline 20-year event specific mortality probabilities and aspirin-related reductions (per 100 individuals) using best (and conservative) estimates for prophylactic use of aspirin for 10 years on mortality due to cancer, myocardial infarction, stroke, and aspirin-related adverse events (peptic ulcer and gastrointestinal bleeding) according to sex and age at starting use.

Effects on cardiovascular and bleeding events are assumed to occur only during active treatment (10 years) and those for cancer do not start until after 5 years of use but persist for an additional 10 years after treatment completion. The effect of aspirin is restricted to only three gastrointestinal cancers (colorectal, oesophageal and gastric cancers). Baseline rates are for the entire 20 year period. Figures in parentheses are conservative estimates.

| Age at starting         |       | 50 years |                | 55 years |                | 60 years |                | 65 years |                |
|-------------------------|-------|----------|----------------|----------|----------------|----------|----------------|----------|----------------|
| Mortality               |       | Baseline | Reduction      | Baseline | Reduction      | Baseline | Reduction      | Baseline | Reduction      |
| <b>Cancer</b>           | Men   | 7.45     | 0.64<br>(0.57) | 11.59    | 0.92<br>(0.81) | 16.40    | 1.23<br>(1.08) | 20.53    | 1.43<br>(1.25) |
|                         | Women | 6.12     | 0.29<br>(0.26) | 8.80     | 0.44<br>(0.39) | 12.04    | 0.64<br>(0.56) | 15.26    | 0.87<br>(0.76) |
| <b>MI</b>               | Men   | 5.08     | 0.07           | 8.05     | 0.12           | 11.80    | 0.20           | 15.13    | 0.31           |
|                         | Women | 1.80     | 0.02           | 3.44     | 0.04           | 6.02     | 0.08           | 9.33     | 0.14           |
| <b>TOTAL</b>            | Men   | 12.53    | 0.71<br>(0.63) | 19.64    | 1.04<br>(0.93) | 28.19    | 1.43<br>(1.28) | 35.66    | 1.74<br>(1.57) |
|                         | Women | 7.92     | 0.31<br>(0.28) | 12.24    | 0.48<br>(0.43) | 18.06    | 0.71<br>(0.64) | 24.60    | 1.01<br>(0.91) |
| <b>Adverse events</b>   |       | Baseline | Excess         | Baseline | Excess         | Baseline | Excess         | Baseline | Excess         |
| <b>Stroke</b>           | Men   | 1.03     | 0.06           | 1.85     | 0.09           | 3.21     | 0.17           | 4.83     | 0.32           |
|                         | Women | 0.74     | 0.04           | 1.47     | 0.06           | 2.90     | 0.11           | 5.12     | 0.26           |
| <b>GI bleeding</b>      | Men   | 0.19     | 0.04<br>(0.04) | 0.34     | 0.05<br>(0.06) | 0.57     | 0.08<br>(0.09) | 0.74     | 0.17<br>(0.19) |
|                         | Women | 0.12     | 0.02<br>(0.03) | 0.22     | 0.03<br>(0.04) | 0.39     | 0.05<br>(0.06) | 0.59     | 0.11<br>(0.13) |
| <b>Peptic Ulcer</b>     | Men   | 0.08     | 0.02<br>(0.02) | 0.12     | 0.03<br>(0.03) | 0.15     | 0.03<br>(0.04) | 0.17     | 0.05<br>(0.06) |
|                         | Women | 0.07     | 0.02<br>(0.02) | 0.10     | 0.02<br>(0.02) | 0.13     | 0.03<br>(0.03) | 0.16     | 0.04<br>(0.05) |
| <b>TOTAL</b>            | Men   | 1.29     | 0.11<br>(0.12) | 2.31     | 0.17<br>(0.18) | 3.93     | 0.28<br>(0.30) | 5.73     | 0.54<br>(0.58) |
|                         | Women | 0.93     | 0.09<br>(0.09) | 1.79     | 0.11<br>(0.12) | 3.42     | 0.19<br>(0.21) | 5.86     | 0.41<br>(0.44) |
| <b>All-cause Deaths</b> | Men   | 18.02    | 0.59<br>(0.51) | 27.67    | 0.87<br>(0.75) | 41.99    | 1.15<br>(0.98) | 58.74    | 1.20<br>(0.99) |
|                         | Women | 11.82    | 0.23<br>(0.18) | 18.55    | 0.37<br>(0.30) | 29.86    | 0.52<br>(0.43) | 47.45    | 0.60<br>(0.47) |

**Section B:****METHODS:****Measurement of harmful effects of aspirin**

Systematic MEDLINE searches were carried out to determine i) magnitude of increase in harms caused by aspirin ii) age and sex-specific baseline rates of gastrointestinal bleeding, peptic ulcer and major extracranial bleeding (Table 2 in the main text) iii) and the proportion of UGIC attributable to *H. pylori* infection in the UK general population. The estimates of mortality due to peptic ulcer and gastrointestinal bleeding were based on applying age-specific case-fatality rates (5% below and 10% above 70 years of age) to the respective incidence rates. Case-fatality rates were also derived from several studies [s1-7] identified through a systematic MEDLINE search.

**Derivation of effect sizes (Table 3 in the main text) used for modelling****Effect sizes for cardiovascular disease:**

All effect sizes used are directly taken from ATT Collaborators' review [s8].

**Effect sizes for bleeding and ulcer harms:**

Effect sizes derived as reported elsewhere [s9].

**Effect sizes for cancer:** Based on data presented in Table 1 (main text)

## General rules:

- Data from case-control studies are based on a very large number of cancer incidence events, and these are generally consistent with data from RCTs [s10]. Therefore, derivation of effect sizes for cancer incidence is based on data from RCTs, case-control studies and cohort studies.
- On the other hand, data from case-control studies for cancer mortality events are sparse. Therefore, derivation of effect sizes for cancer mortality is based on data from RCTs and cohort studies.
- All effect sizes are assumed in steps of 5%.
- Estimates for >5 years of aspirin use are considered where available
- Effect sizes are based on a non-weighted average of estimates from different study types.\*
- Non-weighted average thus obtained is rounded to the closest 5% step on the side of unity. For example, non-weighted average estimates of 0.62 and 0.88 yield best estimate RRs of 0.65 and 0.90 respectively.

- Conservative estimates assume a 5% smaller effect than best estimates. For example, if best estimate is 0.75, conservative estimate is taken as 0.80.

\* In case of colorectal cancer, substantial heterogeneity in estimates exists across different study types, non-weighted average of estimates from consistent study types (i.e. case-control studies and RCTs) is taken.



**FINDINGS:****Bleeding and other side effects**

Without a doubt increased bleeding is the most important side effect of aspirin [s9]. Haemorrhagic stroke, although rare, is the most serious and potentially fatal side effect. Estimates suggest a relative increase of 32-36% in haemorrhagic strokes in aspirin users from a baseline rate of 0.03%/year [s8, 11-14].

Much commoner are the extracranial (predominantly gastro-intestinal) bleeds, where the risk for major events is increased by about 30-70% from an overall baseline risk of 0.7 per 1000 per year [s8, 11, 12, 14-16] with low or standard-dose aspirin treatment [s9]. Absolute risks differ substantially across the population (Table 2 in the main text). Aspirin-related gastro-intestinal bleeding is frequently a result of either aspirin-induced acute erosive gastritis or haemorrhagic complication of peptic ulcer. Different studies [s8, 17-20] report different baseline major bleeding rates due to differences in the definitions and populations. We use rates estimated from ATT data and the basis for this is fully discussed elsewhere [s9]. The baseline risk of uncomplicated peptic ulcer in the general population increases from 0.5 per 1000 per year in women and 0.6 per 1000 per year in men aged 50-54 years to 1.0 and 1.2, respectively per 1000 per year at age 65-69 years [s21]. However, these events may be under-reported as higher rates were seen in some trials [s22, 23]. RCTs report a 30-60% increase in peptic ulcers associated with aspirin use [s22-24]. The incidence of peptic ulcer in the developed world is declining [s21, 25], perhaps due to the decline in prevalence of *H. pylori* infection [s26, 27] and the increasing use of proton pump inhibitors for treating peptic ulceration [s21, 28]. Other frequent bleeding events like epistaxis and haematuria are rarely serious, but can limit population utilization and aspirin increases the risk of these by 5-15% [s22]. Overall, the rates of gastro-intestinal complications increase steeply beyond age 70y [s19, 29, 30] and fatality rates show a similar trend [s5], but the rates and fatality ratios are low below 70 years of age.

**Aspirin use after cancer diagnosis, effect on metastasis and survival.**

Aspirin appears to have an impact on mortality that exceeds its effect on incidence [s31]. Aspirin may reduce metastatic spread through its effect on platelets [s32, 33], but it may also act through other mechanisms [s34-37]. RCTs show larger effect sizes for cancer mortality reduction than those for cancer incidence reduction [s38]. RCTs have also shown a lower proportion of cancers with metastases at presentation in those taking aspirin and lower propensity to develop metastases in those who continue aspirin after cancer diagnosis [s39]. Observational studies in breast cancer [s40], and colorectal cancer [s41, 42] have shown similar observations of reduced metastasis and improved survival in patients taking or continuing aspirin after the diagnosis of cancer. Recent evidence from the Nurses' Health Study and the Health Professionals Follow-up Study suggests that *PIK3CA* mutation may be a predictive biomarker for aspirin efficacy in adjuvant treatment [s43]. Therapeutic use of aspirin in colorectal cancer is currently being investigated in the ASCOLT trial [s44] whereas the Big A trial [s45] will investigate aspirin as an adjuvant treatment in non-small cell lung cancer. Another trial (ADD-Aspirin) is being set up in the UK to investigate role of aspirin in adjuvant treatment of colorectal, gastro-oesophageal, breast and prostate cancers [s37].

## Supplementary References:

- s1. Button LA, Roberts SE, Evans PA et al. Hospitalized incidence and case fatality for upper gastrointestinal bleeding from 1999 to 2007: a record linkage study. *Aliment Pharmacol Ther* 2010; 33: 64-76.
- s2. Garcia Rodriguez LA, Ruigomez A, Hasselgren G et al. Comparison of mortality from peptic ulcer bleed between patients with or without peptic ulcer antecedents. *Epidemiology* 1998; 9: 452-456.
- s3. Hasselgren G, Blomqvist A, Eriksson S et al. Short and long term course of elderly patients with peptic ulcer bleeding--analysis of factors influencing fatal outcome. *Eur J Surg* 1998; 164: 685-691.
- s4. Henry DA, Johnston A, Dobson A, Duggan J. Fatal peptic ulcer complications and the use of non-steroidal anti-inflammatory drugs, aspirin, and corticosteroids. *Br Med J (Clin Res Ed)* 1987; 295: 1227-1229.
- s5. Kang JY, Elders A, Majeed A et al. Recent trends in hospital admissions and mortality rates for peptic ulcer in Scotland 1982-2002. *Aliment Pharmacol Ther* 2006; 24: 65-79.
- s6. Lanas A, Garcia-Rodriguez LA, Polo-Tomas M et al. Time trends and impact of upper and lower gastrointestinal bleeding and perforation in clinical practice. *Am J Gastroenterol* 2009; 104: 1633-1641.
- s7. Paspatis GA, Matrella E, Kapsoritakis A et al. An epidemiological study of acute upper gastrointestinal bleeding in Crete, Greece. *Eur J Gastroenterol Hepatol* 2000; 12: 1215-1220.
- s8. Baigent C, Blackwell L, Collins R et al. Aspirin in the primary and secondary prevention of vascular disease: collaborative meta-analysis of individual participant data from randomised trials. *Lancet* 2009; 373: 1849-1860.
- s9. Thorat MA, Cuzick J. Prophylactic use of aspirin: Systematic review of harms and approaches to mitigation in the general population. (*Manuscript submitted*).
- s10. Algra AM, Rothwell PM. Effects of regular aspirin on long-term cancer incidence and metastasis: a systematic comparison of evidence from observational studies versus randomised trials. *Lancet Oncol* 2012; 13: 518-527.
- s11. McQuaid KR, Laine L. Systematic review and meta-analysis of adverse events of low-dose aspirin and clopidogrel in randomized controlled trials. *Am J Med* 2006; 119: 624-638.
- s12. Berger JS, Lala A, Krantz MJ et al. Aspirin for the prevention of cardiovascular events in patients without clinical cardiovascular disease: a meta-analysis of randomized trials. *Am Heart J* 2011; 162: 115-124 e112.
- s13. Hart RG, Halperin JL, McBride R et al. Aspirin for the primary prevention of stroke and other major vascular events: meta-analysis and hypotheses. *Arch Neurol* 2000; 57: 326-332.
- s14. Raju N, Sobieraj-Teague M, Hirsh J et al. Effect of aspirin on mortality in the primary prevention of cardiovascular disease. *Am J Med* 2011; 124: 621-629.
- s15. Sanmuganathan PS, Ghahramani P, Jackson PR et al. Aspirin for primary prevention of coronary heart disease: safety and absolute benefit related to coronary risk derived from meta-analysis of randomised trials. *Heart* 2001; 85: 265-271.
- s16. Seshasai SR, Wijesuriya S, Sivakumaran R et al. Effect of aspirin on vascular and nonvascular outcomes: meta-analysis of randomized controlled trials. *Arch Intern Med* 2012; 172: 209-216.
- s17. USPSTF. Aspirin for the prevention of cardiovascular disease: U.S. Preventive Services Task Force recommendation statement. *Ann Intern Med* 2009; 150: 396-404.
- s18. De Berardis G, Lucisano G, D'Ettorre A et al. Association of aspirin use with major bleeding in patients with and without diabetes. *JAMA* 2012; 307: 2286-2294.
- s19. Hernandez-Diaz S, Garcia Rodriguez LA. Cardioprotective aspirin users and their excess risk of upper gastrointestinal complications. *BMC Med* 2006; 4: 22.
- s20. Wolff T, Miller T, Ko S. Aspirin for the primary prevention of cardiovascular events: an update of the evidence for the U.S. Preventive Services Task Force. *Ann Intern Med* 2009; 150: 405-410.

- s21. Cai S, Garcia Rodriguez LA, Masso-Gonzalez EL, Hernandez-Diaz S. Uncomplicated peptic ulcer in the UK: trends from 1997 to 2005. *Aliment Pharmacol Ther* 2009; 30: 1039-1048.
- s22. Ridker PM, Cook NR, Lee IM et al. A randomized trial of low-dose aspirin in the primary prevention of cardiovascular disease in women. *N Engl J Med* 2005; 352: 1293-1304.
- s23. Steering Committee of the Physicians' Health Study Research Group. Final report on the aspirin component of the ongoing Physicians' Health Study. *N Engl J Med* 1989; 321: 129-135.
- s24. Peto R, Gray R, Collins R et al. Randomised trial of prophylactic daily aspirin in British male doctors. *Br Med J (Clin Res Ed)* 1988; 296: 313-316.
- s25. Garcia Rodriguez LA, Hernandez-Diaz S. Risk of uncomplicated peptic ulcer among users of aspirin and nonaspirin nonsteroidal antiinflammatory drugs. *Am J Epidemiol* 2004; 159: 23-31.
- s26. Jackson L, Britton J, Lewis SA et al. A population-based epidemiologic study of *Helicobacter pylori* infection and its association with systemic inflammation. *Helicobacter* 2009; 14: 108-113.
- s27. Vyse AJ, Gay NJ, Hesketh LM et al. The burden of *Helicobacter pylori* infection in England and Wales. *Epidemiol Infect* 2002; 128: 411-417.
- s28. Hermansson M, Ekedahl A, Ranstam J, Zilling T. Decreasing incidence of peptic ulcer complications after the introduction of the proton pump inhibitors, a study of the Swedish population from 1974-2002. *BMC Gastroenterol* 2009; 9: 25.
- s29. Patrono C, Garcia Rodriguez LA, Landolfi R, Baigent C. Low-dose aspirin for the prevention of atherothrombosis. *N Engl J Med* 2005; 353: 2373-2383.
- s30. Lanas A, Perez-Aisa MA, Feu F et al. A nationwide study of mortality associated with hospital admission due to severe gastrointestinal events and those associated with nonsteroidal antiinflammatory drug use. *Am J Gastroenterol* 2005; 100: 1685-1693.
- s31. Thorat MA, Cuzick J. Role of aspirin in cancer prevention. *Curr Oncol Rep* 2013; 15: 533-540.
- s32. Gasic GJ, Gasic TB, Stewart CC. Antimetastatic effects associated with platelet reduction. *Proc Natl Acad Sci U S A* 1968; 61: 46-52.
- s33. Gasic GJ, Gasic TB, Murphy S. Anti-metastatic effect of aspirin. *Lancet* 1972; 2: 932-933.
- s34. Hawley SA, Fullerton MD, Ross FA et al. The ancient drug salicylate directly activates AMP-activated protein kinase. *Science* 2012; 336: 918-922.
- s35. Shaw RJ, Cantley LC. Cell biology. Ancient sensor for ancient drug. *Science* 2012; 336: 813-814.
- s36. Din FV, Valanciute A, Houde VP et al. Aspirin inhibits mTOR signaling, activates AMP-activated protein kinase, and induces autophagy in colorectal cancer cells. *Gastroenterology* 2012; 142: 1504-1515 e1503.
- s37. Langley RE, Burdett S, Tierney JF et al. Aspirin and cancer: has aspirin been overlooked as an adjuvant therapy? *Br J Cancer* 2011; 105: 1107-1113.
- s38. Rothwell PM, Price JF, Fowkes FG et al. Short-term effects of daily aspirin on cancer incidence, mortality, and non-vascular death: analysis of the time course of risks and benefits in 51 randomised controlled trials. *Lancet* 2012; 379: 1602-1612.
- s39. Rothwell PM, Wilson M, Price JF et al. Effect of daily aspirin on risk of cancer metastasis: a study of incident cancers during randomised controlled trials. *Lancet* 2012; 379: 1591-1601.
- s40. Holmes MD, Chen WY, Li L et al. Aspirin Intake and Survival After Breast Cancer. *Journal of Clinical Oncology* 2010; 28: 1467-1472.
- s41. Chan AT, Ogino S, Fuchs CS. Aspirin Use and Survival After Diagnosis of Colorectal Cancer. *JAMA: The Journal of the American Medical Association* 2009; 302: 649-658.
- s42. Bastiaannet E, Sampieri K, Dekkers OM et al. Use of aspirin postdiagnosis improves survival for colon cancer patients. *Br J Cancer* 2012; 106: 1564-1570.
- s43. Liao X, Lochhead P, Nishihara R et al. Aspirin use, tumor PIK3CA mutation, and colorectal-cancer survival. *N Engl J Med* 2012; 367: 1596-1606.
- s44. Ali R, Toh HC, Chia WK. The utility of Aspirin in Dukes C and High Risk Dukes B Colorectal cancer--the ASCOLT study: study protocol for a randomized controlled trial. *Trials* 2011; 12: 261.

s45. Fontaine E, McShane J, Page R et al. Aspirin and non-small cell lung cancer resections: effect on long-term survival. *Eur J Cardiothorac Surg* 2010; 38: 21-26.

Supplementary Material doi:10.1093/annonc/mdu225
